# Supplementary material
Source: Springer Nature journal article supplement (https://www.springermedizin.de/resource/supplementary/12913_2008_999_MOESM1_ESM.pdf/9536104)
Supplement: MOESM1 [file 9536104]

## Enquête du CRI

### Traitements par agents anti-TNF : quel bilan pré-thérapeutique ?

Frédéric Lioté, Thao Pham, Philippe Ravaud

Les traitements anti-TNF sont prescrits chez des patients atteints de PR ou de spondylarthropathies. Les indications sont actuellement libellées selon les AMM. Ils exposent à un certain nombre d'effets secondaires de sévérité variable pour lesquels il n'y a actuellement en France que peu de recommandations de pratiques ou de prescription d'examens pré-thérapeutiques. Chaque clinicien évalue le cas particulier de son patient selon sa propre expérience.

Au nom du CRI, nous vous proposons de répondre à une enquête anonyme à partir d'un cas clinique, simple et rapide, sur vos pratiques cliniques et les mesures que vous prenez chez vos patients avant prescription d'un traitement anti-TNF. Il s'agit de faire un instantané, un état des lieux des pratiques réelles dans notre pays.

---

Age : |\_|\_| ans

Sexe F  M

Année d'obtention de la spécialité : |\_|\_|\_|\_|

Membre de la SFR: Oui  Non

Modalités actuelles d'exercice :

- libéral exclusif
- praticien attaché hospitalier et exercice libéral
- hospitalier temps plein  temps partiel
- hospitalo-universitaire (PU-PH, PHU, MCU-PH)  CCA  interne de spécialité

Avez-vous déjà prescrit vous-même un traitement anti-TNF ?

Oui  Non

Dans le service hospitalier où vous exercez en consultation ou en salle, disposez-vous d'une liste systématique d'items et d'examens à vérifier avant prescription d'un anti-TNF ?

Oui  Non  Ne sait pas

Numéro d'anonymat : A

Femme, 50 ans, polyarthrite rhumatoïde séropositive (FR IgM) depuis 7 ans avec :

- Echappement à une bithérapie MTX (20 mg/sem PO) + Salazopyrine (2 g/j) + corticothérapie de 10 mg/j + AINS conventionnel à pleine dose.
- Antécédents :
  - o ménopause depuis 1 an non substituée, fibro-adénome mammaire
  - o hypothyroïdie secondaire à une maladie de Hashimoto
  - o Fille de 29 ans atteinte de la même dysthyroïdie
  - o Fracture de côte après chute au décours d'un vertige de Ménière
- Examen clinique
  - o Pression artérielle = 120/76, auscultation cardiopulmonaire normale
  - o Absence de nodule rhumatoïde ou de signe de vascularite

Vous voulez traiter cette patiente par un agent anti-TNF. Quel est votre bilan pré-thérapeutique (en dehors du bilan d'activité ou de sévérité de la maladie) ?

1. Quelles données spécifiques recherchez-vous dans les antécédents de votre patiente ?

2. Quelles données de l'examen physique recueillez-vous ?

3. Quels examens biologiques, radiologiques et autres prescrivez-vous ?

4. Quelles autres mesures préventives prenez-vous ?
